# Supplementary material for: Providing longer post-fledging periods increases offspring survival at the expense of future fecundity
Source: PLoS One. 2018 Sep 10;13(9):e0203152. doi: 10.1371/journal.pone.0203152 (PMC6130873; doi:10.1371/journal.pone.0203152)
Supplement: S4 Table — (DOCX) [file pone.0203152.s004.docx]

S4 Table

|  | PFDPmeant | Laying datet+1 | Clutch sizet | N. of fledglingst |
| --- | --- | --- | --- | --- |
| PFDPmeant | 1 | 0.235 | 0.235 | 0.275 |
| Laying datet+1 |  | 1 | -0.107 | -0.112 |
| Clutch sizet |  |  | 1 | 0.595*** |
| N. of fledglingst |  |  |  | 1 |

Correlation coefficients between each pair of variables used as explanatory in the models exploring the association between the mean duration of the post-fledgling dependence period (PFDPmean) and followings year (*t+1*) reproductive output in females. Asterisks represent the significance of the correlations (***p<0.001; **p<0.01; *p<0.05).
